# Inactivation of SAG E3 Ubiquitin Ligase Blocks Embryonic Stem Cell Differentiation and Sensitizes Leukemia Cells to Retinoid Acid

Mingjia Tan<sup>1,2,3</sup>, Yun Li<sup>1,2,3</sup>, Ruiguo Yang<sup>3</sup>, Ning Xi<sup>3</sup>, Yi Sun<sup>1\*</sup>

**1** Division of Radiation and Cancer Biology, Department of Radiation Oncology, University of Michigan, Ann Arbor, Michigan, United States of America, **2** Key Laboratory of Marine Drugs, Chinese Ministry of Education, and School of Medicine and Pharmacy, Ocean University of China, Qingdao, China, **3** Department of Electrical and Computer Engineering, Michigan State University, East Lansing, Michigan, United States of America

## Abstract

Sensitive to Apoptosis Gene (SAG), also known as RBX2 (RING box protein-2), is the RING component of SCF (SKP1, Cullin, and F-box protein) E3 ubiquitin ligase. Our previous studies have demonstrated that SAG is an anti-apoptotic protein and an attractive anti-cancer target. We also found recently that *Sag* knockout sensitized mouse embryonic stem cells (mES) to radiation and blocked mES cells to undergo endothelial differentiation. Here, we reported that compared to wild-type mES cells, the *Sag*<sup>-/-</sup> mES cells were much more sensitive to all-trans retinoic acid (RA)-induced suppression of cell proliferation and survival. While wild-type mES cells underwent differentiation upon exposure to RA, *Sag*<sup>-/-</sup> mES cells were induced to death via apoptosis instead. The cell fate change, reflected by cellular stiffness, can be detected as early as 12 hrs post RA exposure by AFM (Atomic Force Microscopy). We then extended this novel finding to RA differentiation therapy of leukemia, in which the resistance often develops, by testing our hypothesis that SAG inhibition would sensitize leukemia to RA. Indeed, we found a direct correlation between SAG overexpression and RA resistance in multiple leukemia lines. By using MLN4924, a small molecule inhibitor of NEDD8-Activating Enzyme (NAE), that inactivates SAG-SCF E3 ligase by blocking cullin neddylation, we were able to sensitize two otherwise resistant leukemia cell lines, HL-60 and KG-1 to RA. Mechanistically, RA sensitization by MLN4924 was mediated via enhanced apoptosis, likely through accumulation of pro-apoptotic proteins NOXA and c-JUN, two well-known substrates of SAG-SCF E3 ligase. Taken together, our study provides the proof-of-concept evidence for effective treatment of leukemia patients by RA-MLN4924 combination.

**Citation:** Tan M, Li Y, Yang R, Xi N, Sun Y (2011) Inactivation of SAG E3 Ubiquitin Ligase Blocks Embryonic Stem Cell Differentiation and Sensitizes Leukemia Cells to Retinoid Acid. PLoS ONE 6(11): e27726. doi:10.1371/journal.pone.0027726

**Editor:** Wafik S. El-Deiry, Penn State Hershey Cancer Institute, United States of America

**Received:** July 5, 2011; **Accepted:** October 23, 2011; **Published:** November 15, 2011

**Copyright:** © 2011 Tan et al. This is an open-access article distributed under the terms of the Creative Commons Attribution License, which permits unrestricted use, distribution, and reproduction in any medium, provided the original author and source are credited.

**Funding:** This work is supported by the National Cancer Institute grants CA111554, CA118762 and CA156744 to YS. This work is also supported by National Science Foundation grant IIS0713346 and National Institutes of Health grant R43 GM084520 to NX. YL was supported in part by the fellowship from China Scholarship Council and Ocean University of China. The funders had no role in study design, data collection and analysis, decision to publish, or preparation of the manuscript.

**Competing Interests:** The authors have declared that no competing interests exist.

\* E-mail: sunyi@umich.edu

These authors contributed equally to this work.

## Introduction

SAG, also known as RBX2, ROC2 (Regulator of Cullins) or RNF7 (RING finger protein-7), was originally cloned in our laboratory as a redox-inducible antioxidant protein [1], and later characterized as the second RING family member of the SCF E3 ubiquitin ligase (for review, see [2]). We and others have previously shown that in cell culture systems, SAG overexpression inhibited apoptosis induced by various agents, including redox [1,3], nitric oxide [4], ischemia/hypoxia [5], heat shock [6], neurotoxins and 1-methyl-4-phenylpyridinium [7], and UV-irradiation [8]. SAG over-expression also promoted the S-phase entry and cell growth under serum starved conditions [9]. Furthermore, SAG transgenic expression in mouse skin inhibited tumor formation at the early stage, but enhances tumor growth at the later stage in a DMBA-TPA carcinogenesis model [10]. On the other hand, SAG knockdown by anti-sense or siRNA oligoes inhibited tumor cell growth [11], and enhanced apoptosis induced by etoposide and TRAIL [12]. The *Sag* knockout in mouse caused embryonic

lethality, which is associated with growth retardation and other developmental defects [13], whereas *Sag* knockout in mES cells induced radiosensitization [14], and blocked their endothelial differentiation [13]. These cellular functions were mediated via its antioxidant activity by scavenging ROS [1,4,6], and via its E3 ubiquitin ligase activity by promoting the degradation of p27, c-Jun, pro-caspase-3, IκBα, HIF-1α, and NOXA in a cell context dependent manner [9,10,12,15,16,17]. Importantly, SAG was overexpressed in carcinomas of lung, colon, stomach and liver, which was associated with poor prognosis in lung cancer patients [11,17,18]. The findings suggest that SAG may play a role in human tumorigenesis and could serve as an anticancer target.

Retinoic acids (RAs) are natural and synthetic derivatives of vitamin A [19]. The binding of RAs to their nuclear receptors, including RAR or RXR, PPAR in the homo- and hetero-dimer formats [20], caused transactivation of more than 500 genes [21] that regulates many signaling pathways [22], and cellular processes including embryonic development, organogenesis, cell homeostasis, cell growth, differentiation and apoptosis [23,24,25,26]. Given

its activity in inducing differentiation, apoptosis, and growth arrest, RA has been long used for the treatment and prevention of various types of human cancers [19,27,28,29,30], particularly as a differentiation therapy agent for the treatment of AML (Acute Myeloid Leukemia) [31,32]. Significantly, RA is very effective for the treatment of one type AML, acute promyelocytic leukemia (APL) with a cure rate in more than 75% of patients [26]. However, the complete success of this therapy was hindered by the development of RA resistance with subsequent disease relapses [30], demanding combinational therapies, most effectively with arsenic trioxide [33], and other chemotherapeutic drugs, as well as targeted therapies, including TRAIL [26,27,30].

Here we report that cellular sensitivity to RA is significantly increased upon inactivation of SAG E3 ubiquitin ligase via genetic deletion or pharmacological inhibition. Specifically, instead of inducing differentiation in wild type mES cells, RA induced apoptosis in *Sag*<sup>-/-</sup> mES cells. In two SAG high-expressing AML lines, HL60 and KG-1, MLN4924, a small molecule inhibitor of SAG E3, effectively sensitized otherwise resistant cells to RA via induction of apoptosis which is associated with accumulation of pro-apoptotic proteins, c-JUN and NOXA. Thus, our study reveals that SAG is a RA sensitizing target and provides the first proof-of-concept evidence that MLN4924 can be further developed as a RA chemo-sensitizer for the treatment of AML.

## Results

### Sag deletion sensitized mouse embryonic stem cell to RA

Our recent study showed that *Sag*<sup>-/-</sup> mES cells failed to undergo endothelial differentiation to form cystic embryoid bodies upon the withdrawal of LIF (leukemia inhibitory factor) from culture media [13]. Here we determined if *Sag*<sup>-/-</sup> mES cells were also defective in RA-induced differentiation. Using two independent pairs of mES clones with *Sag*<sup>+/+</sup> vs. *Sag*<sup>-/-</sup> background [14], we first determined the effect of *Sag* deletion on cell proliferation and survival in the absence and presence of RA. While *Sag* deletion had no effect on monolayer and clonogenic growth, it significantly sensitized mES cells to RA. The IC<sub>50</sub> value (the concentration that caused 50% growth inhibition), determined by ATPlite-based cell proliferation assay, was 3.4- to 5.7-fold lower in *Sag*<sup>-/-</sup> mES cells than *Sag*<sup>+/+</sup> mES cells (Fig. 1A). Likewise, the clonogenic survival assay showed a similar 3- to 4-fold sensitization to RA upon *Sag* deletion (Fig. 1B, 1C). Thus, *Sag* deletion sensitizes mES cells to RA.

### Sag deletion impaired ES cell differentiation induced by RA

We next used one representative pair of mES cells (AB1/*Sag*<sup>-/-</sup> vs. AB2/*Sag*<sup>+/+</sup>) to determine if *Sag*<sup>-/-</sup> mES cells failed to undergo RA-induced differentiation. We plated mES cells in low density in

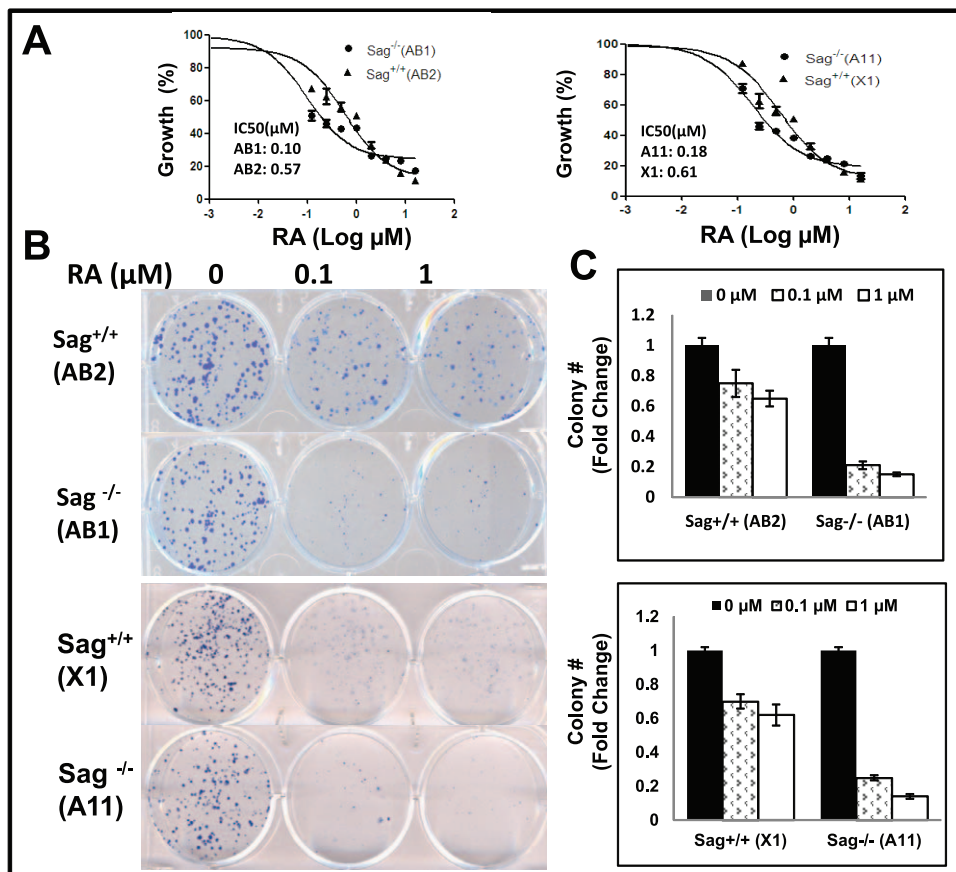

**Figure 1. Sag deletion sensitizes mES cells to all-trans Retinoid Acid (RA).** Two independent pairs of mES cells with genotypes of *Sag*<sup>+/+</sup> and *Sag*<sup>-/-</sup> were seeded in 96-well plate in triplicate and treated with various concentrations of RA for 24 hrs. Cell viability was measured by ATP-lite assay. The IC<sub>50</sub> curve was generated and IC<sub>50</sub> value calculated by the Prism software (A). Cells were seeded in 6-well plate in duplicate and treated with DMSO vehicle control or RA (0.1 and 1 μM) for 6 days. The plates were stained (B) and the colonies with more than 50 cells were counted and plotted (C). Shown is  $x \pm$  SEM from three independent experiments. doi:10.1371/journal.pone.0027726.g001

gelatin-coated plate, treated with RA at 0, 0.1 and 1  $\mu\text{M}$  for 6 days, and then stained with alkaline phosphatase (AP), a marker for undifferentiated ES cells [34]. In the absence of RA treatment,  $\text{Sag}^{-/-}$  and  $\text{Sag}^{+/+}$  mES cells showed no difference in clonic growth and in the maintenance of the undifferentiated status (Fig. 2A). In the presence of RA treatment (at both 0.1 and 1.0  $\mu\text{M}$ ), however, the proliferation of  $\text{Sag}^{-/-}$  mES cells were severely inhibited with remarkable reduction in the number of undifferentiated colonies (Fig. 2A). Examination microscopically revealed many differentiated cells from  $\text{Sag}^{+/+}$  mES cells, whereas only scarce cell debris were observed in  $\text{Sag}^{-/-}$  mES cells (Fig. 2B), suggesting a robust cell killing. We also used AFM (Atomic Force Microscopy), which measures the cell mechanics, to determine potential early changes during RA-induced differentiation. As shown in Figure 2C, the cellular stiffness was similar between  $\text{Sag}^{+/+}$  and  $\text{Sag}^{-/-}$  mES cells at about 5–7 kPa and was remained constant for 36 hrs in the presence of LIF (to maintain undifferentiated status). Upon addition of RA to induce differentiation, the cellular stiffness increased in  $\text{Sag}^{+/+}$  mES cells, starting at 12 hrs and reaching the peak of 12 kPa at 24 hr. In contrast, the cellular stiffness in  $\text{Sag}^{-/-}$  mES cells decreased by 50% to 2.5 kPa at 12 hrs and fell beyond detection level after 18 hrs, likely due to the initiation of cell death process. The result clearly demonstrated that physical changes, as reflected by cellular stiffness, occur at the very

early stage during RA-induced differentiation, long before any morphological changes which take days to occur.

### Sag deletion enhanced RA induced apoptosis

We next used several independent assays to determine the nature of RA-induced cell death in  $\text{Sag}^{-/-}$  mES cells. Both trypan blue exclusion assay and TUNEL showed that about 30% of  $\text{Sag}^{-/-}$  mES cells were dead or stained TUNEL positively after 36 hrs of RA treatment, compared to  $\sim 3\%$  of  $\text{Sag}^{+/+}$  mES cells (Fig. 3A, 3B). DNA fragmentation assay, a hallmark of apoptosis, showed a remarkable induction of DNA ladders in  $\text{Sag}^{-/-}$ , but not in  $\text{Sag}^{+/+}$  mES cells (Fig. 3C). Likewise, caspase-3 activity assay also showed a significantly higher enzymatic activation in  $\text{Sag}^{-/-}$  than in  $\text{Sag}^{+/+}$  mES cells (Fig. 3D). Taken together, our data suggest that Sag deletion triggers mES cells to undergo apoptosis, instead of differentiation in response to RA.

### Sensitization of AML cells to RA by MLN4924, a SAG-SCF E3 ligase inhibitor

RA was used as a differentiation therapy for AML patients and the disease relapsed upon development of RA resistance [30,31]. We therefore tested our working hypothesis that inactivation of SAG E3 ligase may sensitize AML cells to RA. We first

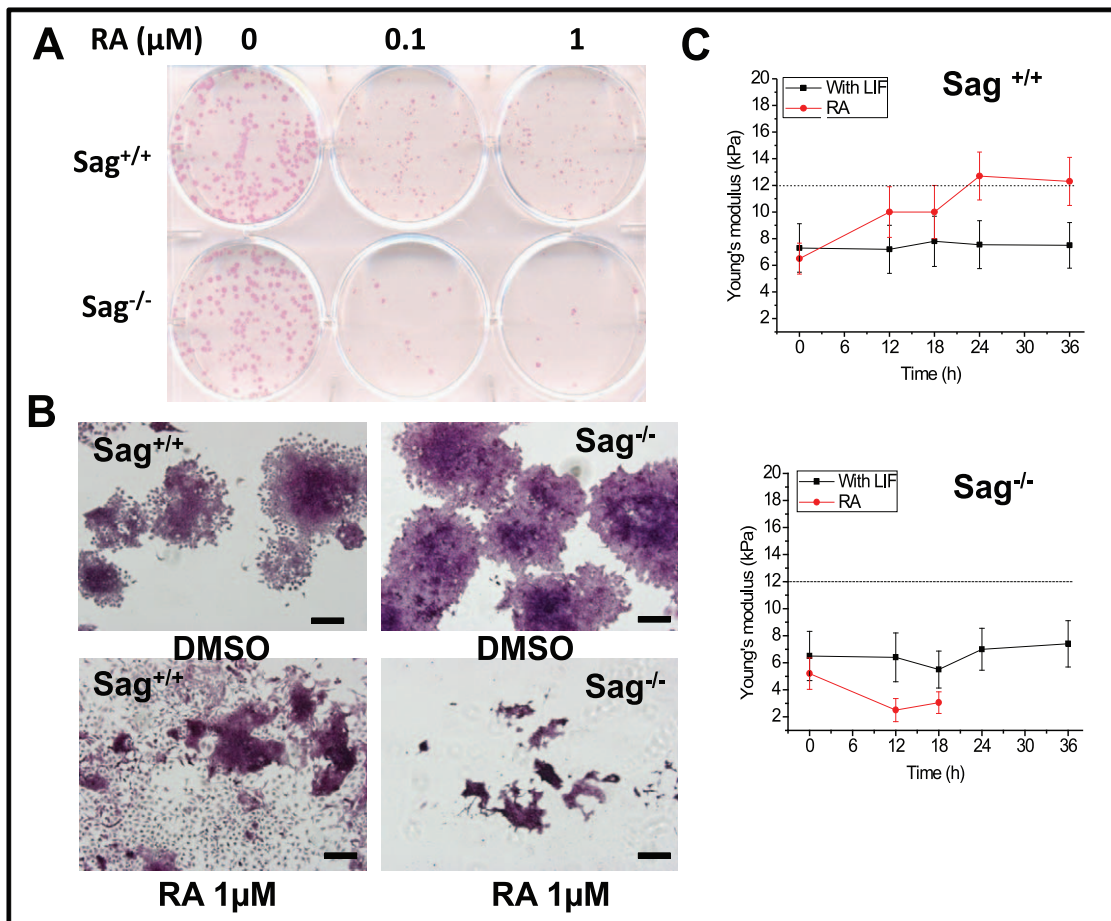

**Figure 2. Sag deletion blocks RA-induced differentiation.**  $\text{Sag}^{+/+}$  and  $\text{Sag}^{-/-}$  mES cells were seeded in 6-well plate and treated with RA at indicated concentrations for 6 days. Colonies were stained with AP (A) and counter-stained with hematoxylin (B), followed by photography. Bar size = 50 nm. Cells were seeded in gelatin-coated glass coverslips and cellular stiffness was measured by AFM nanomechanical analysis at 0, 12, 18, 24 and 36 hrs post RA (1  $\mu\text{M}$ ) treatment. Shown is  $x \pm \text{SD}$  from three independent experiments (C). doi:10.1371/journal.pone.0027726.g002

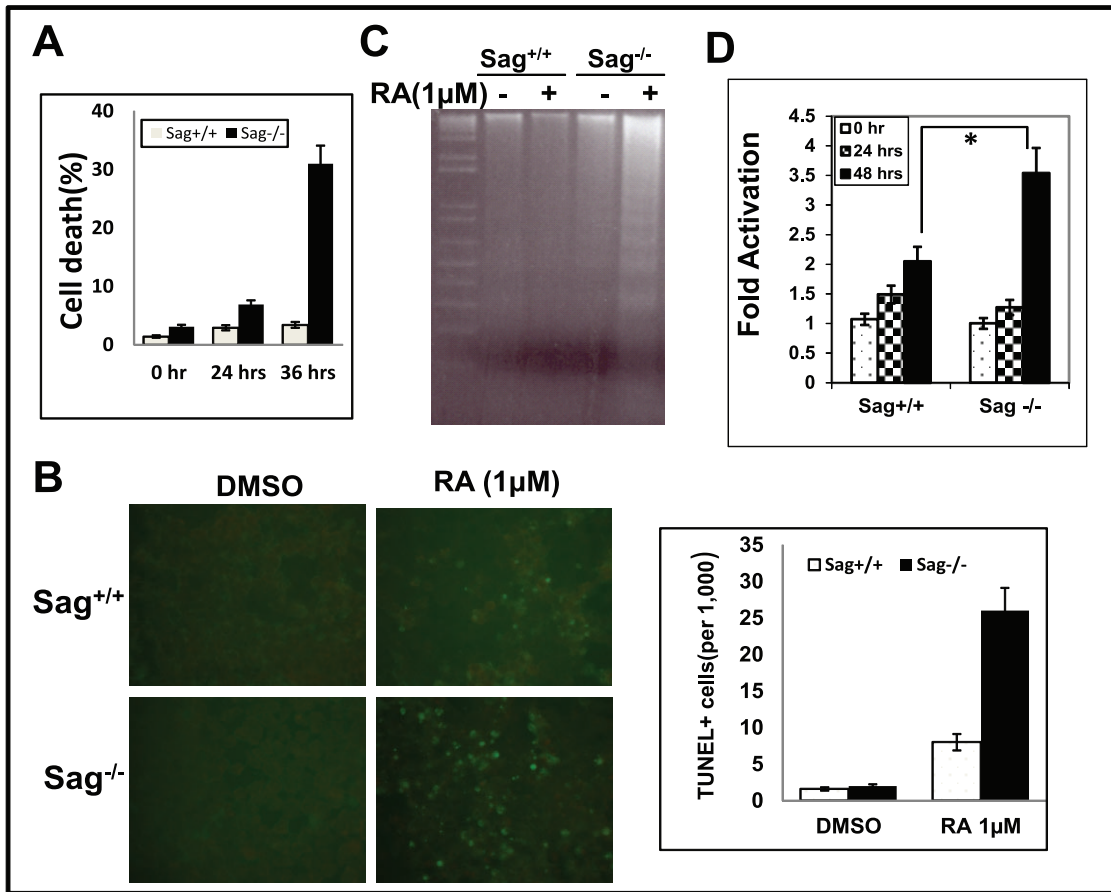

**Figure 3. Sag deletion sensitizes mES cells to RA-induced apoptosis.** mES cells with genotype of Sag<sup>+/+</sup> and Sag<sup>-/-</sup> were treated with DMSO control or 1 μM RA for indicated time periods, followed by trypan blue staining (A), TUNEL staining at 36 hrs (B, left panel), with quantification of TUNEL positive cells graphed (B, right panel), DNA fragmentation assay at 36 hrs (C), and caspase-3 activity assay at the indicated time point (D). \*,  $p < 0.05$ .

doi:10.1371/journal.pone.0027726.g003

determined SAG protein levels in seven AML lines and found SAG expression varied among these lines (Fig. 4A). We then determined a potential correlation between SAG levels and RA sensitivity using two SAG high-expressing lines, HL-60 and KG-1 and one SAG low-expressing line, MV4-11 (Fig. 4A), and found a good correlation with SAG high-expressing cells being much more resistant to RA (IC<sub>50</sub> > 50 μM in HL-60 and KG-1 cells vs. IC<sub>50</sub> < 0.1 μM in MV4-11 cells) (Fig. 4B, left panel). We then used MLN4924, a small molecule inhibitor of NEDD8-Activating Enzyme (NAE), that inactivates SAG-SCF E3 ligase by blocking cullin neddylation [35] for potential RA sensitization. Before the combination study, we determined the cytotoxicity of MLN4924 as a single agent against three AML lines and found again, SAG high-expressing lines were more resistant to MLN4924 with IC<sub>50</sub> of 0.17 μM (HL-60), 2.32 μM (KG-1) and 0.07 μM (MV4-11), respectively (Fig. 4B, right panel). In RA sensitization experiment, we used two concentrations of MLN4924 that caused ~20–30% cytotoxicity when used alone (0.05–0.1 μM for HL-60, and 0.5–1 μM for KG-1 cells) in combination with various concentrations of RA, ranging from 5 nM to 50 μM. We observed a dose-dependent additive or synergistic effect on growth suppression of HL-60 cells (Fig. 4C) or KG-1 cells (Fig. 4D). Thus, SAG inhibitor MLN4924 could sensitize otherwise resistant AML cells to RA.

#### RA-MLN4924 combination enhanced apoptotic cell death

Since Sag deletion sensitized mES cells to RA via apoptosis (Fig. 3), we reasoned that apoptosis would likely be the underlying mechanism for RA sensitization by MLN4924. Indeed, the sub-G1 apoptotic population by FACS analysis was significantly increased by the single treatment of MLN4924, but not RA. MLN4924-RA combination treatment further enhanced apoptosis in both lines (Fig. 5A). Likewise, DNA fragmented ladders (Fig. 5B) as well as cleavages of PARP and caspase-3 (Fig. 3C), the hallmarks of apoptosis, were more evidently seen in the combination group than in MLN4924 single treatment group, although RA alone failed to induce apoptosis. Thus, both HL-60 and KG-1 cells are resistant to RA, and MLN4924 confers RA sensitization by inducing apoptosis.

#### RA-MLN4924 combination enhanced accumulation of pro-apoptotic proteins c-JUN and NOXA

Since SAG is the RING component of SCF E3 ubiquitin ligase required for its ligase activity [36], we expected that SAG-SCF E3 inactivation by MLN4924 via cullin deneddylation would cause accumulation of SAG-SCF E3 ligase substrates. We further expected that MLN4924-RA combination would cause further increase in the levels of critical substrates, responsible for enhanced apoptosis. To

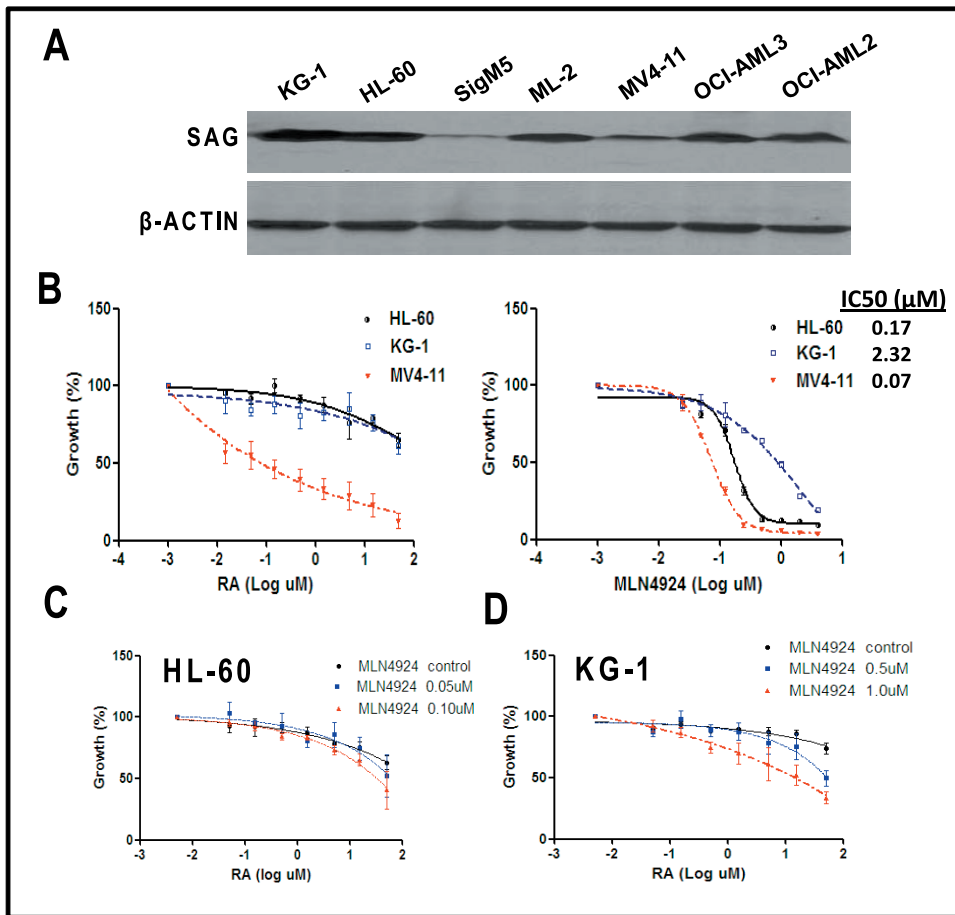

**Figure 4. Correlation between SAG overexpression and RA resistance in AML cell lines and their sensitivity to RA and/or MLN4924.** Proteins were extracted from 7 AML lines and subjected to immunoblotting using antibody against SAG with  $\beta$ -actin as the loading control (A). Cells were seeded in 96-well plate in triplicate and treated with various concentrations of RA (B, left panel), MLN4924 (B, right panel) or in combination at indicated concentrations of each drug for 48 hrs (C, HL-60 cells) and (D, KG-1 cells), followed by ATP-lite cell viability assay. Values were normalized to the untreated control. Shown is  $x \pm$  SEM from three independent experiments with IC50 curve generated and IC50 value calculated using the Prism software.

doi:10.1371/journal.pone.0027726.g004

this end, we first confirmed that MLN4924 treatment indeed caused NEDD8 removal from cullin-1 (Fig. 6A). We then determined potential accumulation of a subset of SAG-SCF E3 substrates known to regulate cell growth, cell cycle progression and apoptosis [37,38], and found expected accumulation by MLN4924 of CDT1,  $\beta$ -catenin, WEE1, p27, phosphor-I $\kappa$ B $\alpha$ , c-JUN and NOXA, but not pro-apoptotic proteins BIM EL and I $\kappa$ B $\alpha$  (Fig 6B, 6C). Among all these substrates tested, only c-JUN in KG-1 cells and NOXA in HL-60 cells were further increased upon MLN4924-RA combination (Fig. 6D), indicating a correlation between further accumulations of c-JUN/NOXA and enhanced induction of apoptosis. In addition, we found that although c-Jun was not detectable in mES cells regardless of RA treatment (data not shown), Noxa, but not another pro-apoptotic protein Bim EL, known as SCF E3 substrate [39], did accumulate in Sag<sup>-/-</sup>, but not Sag<sup>+/+</sup> mES cells upon RA treatment (Fig. 6D). These results further suggest an involvement of NOXA, a newly identified SAG substrate [17], in RA-induced apoptosis.

## Discussion

Our recent work showed that during mES cell differentiation induced by LIF withdrawal, Sag deletion had no effect on the

formation of embryoid bodies, but prevented the endothelial differentiation to form blood island structure [13]. Here we determined the effect of Sag deletion on differentiation induced by RA, a powerful agent that triggers terminal differentiation of mES to many cell types [40]. We found that Sag deletion prevented mES cells from undergoing differentiation, rather triggered apoptosis instead. Although the molecular mechanism that governs the switch from RA-induced differentiation to apoptosis in the absence of Sag E3 ligase merits a future investigation, accumulation of its substrates, such as pro-apoptotic protein Noxa, is likely involved.

In this study, we also found for the first time that AFM, a valid tool in measurement of cell mechanics with incremental application in cell biology [41], can be used to monitor the process of RA-induced mES cell differentiation at very early stage. In wild type mES cells, we observed an increased cellular stiffness, starting at 12 hrs post RA treatment, long before any measurable change in cell morphology. In contrast, Sag<sup>-/-</sup> mES cells showed a decrease in cellular stiffness, followed by its complete loss after 18 hrs, likely at the point when apoptosis is committed. This strike difference, observed at the very early stage of RA differentiation, suggests that the Sag-dependent “decision” of differentiation vs.

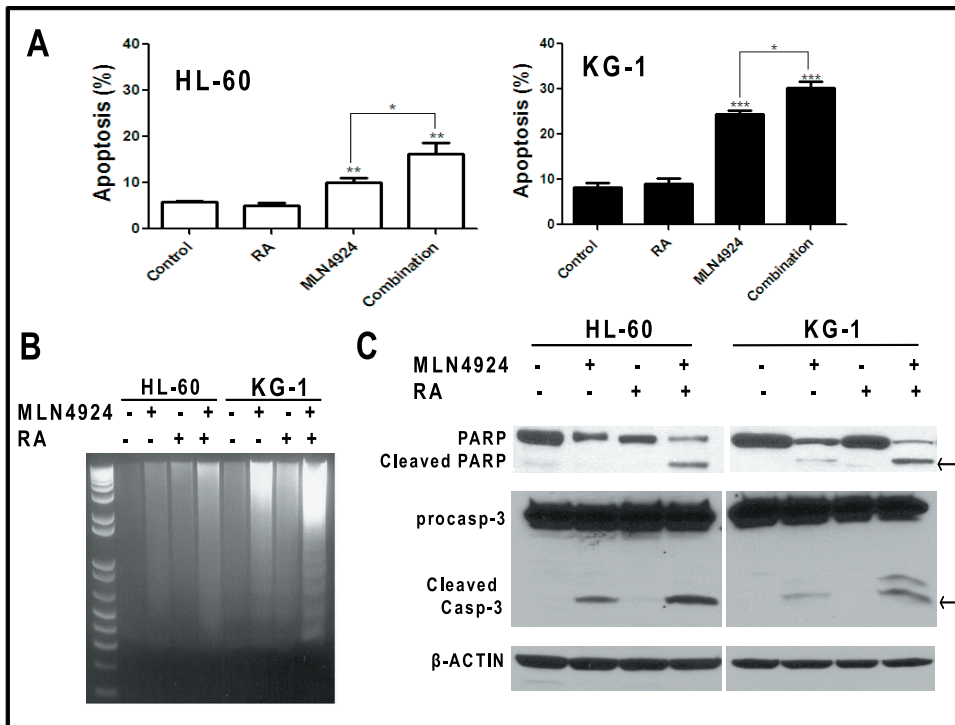

**Figure 5. MLN4924 induces RA sensitization by inducing apoptosis.** Cells were treated with DMSO control, RA (1.5  $\mu$ M), MLN4924 (0.1  $\mu$ M for HL-60, 1.0  $\mu$ M for KG-1) alone or in combination for 24 hrs (HL-60) or 36 hrs (KG-1), followed by FACS analysis for apoptotic sub-G1 population. \*,  $p < 0.05$ ; \*\*,  $p < 0.01$ ; \*\*\*,  $p < 0.0001$ , compared to control (A). Cells were treated with indicated drugs at concentrations described above for 24 hrs, followed by DNA fragmentation assay (B) or immunoblotting using indicated antibodies (C). doi:10.1371/journal.pone.0027726.g005

apoptosis in response to RA, must occur rapidly, likely involving gene transcription (RA effects) and rapid protein turn-over (Sag effects). The data also suggests that AFM measurement of cellular stiffness may be used as an early biomarker for cell differentiation.

Applying our finding of RA sensitization by Sag deletion in mES cells to AML, a human malignancy responsive to RA differentiation therapy, we observed a direct correlation of SAG overexpression and RA resistance. To mimic SAG deletion, we used MLN4924, a newly discovered small molecule inhibitor of NAE [35] that inactivates SAG-SCF E3 ligase by blocking cullin neddylation [35,42], and found that combination of RA and MLN4924 caused significantly more apoptosis than each drug alone in two RA resistant AML cell lines. Mechanistically, we correlated enhanced apoptosis to higher level accumulation of c-JUN in KG-1 cells and of NOXA in HL-60 cells in drug combination. It is worth noting that MLN4924 was recently shown to be an effective apoptosis-inducing agent against AML lines, including MV4-11 and HL-60 [43].

It is well-established that c-JUN forms homo-dimer and hetero-dimer (with c-FOS) to compose active transcription factor AP-1 [44], and that AP-1 is involved in both induction and suppression of apoptosis in a cell context dependent manner [45]. It is also known that c-JUN could form a hetero-dimer with ATF-2 (Activating Transcription Factor-2), a stress responsive bZIP family of transcript factor with context-dependent proliferative as well as pro-apoptotic activities [46,47]. Our observation that c-JUN is further accumulated in RA-MLN4924 treated cells with a consequent enhancement of apoptosis suggested its pro-apoptotic role. On the other hand, NOXA is a well-known BH3 domain-containing pro-apoptotic protein [48], which binds to anti-

apoptotic proteins MCL1 and A1 to release their inhibitory binding with pro-apoptotic proteins BAX and BAK, thus inducing apoptosis [49]. Our recent study revealed that NOXA is a substrate of SAG E3 ligase that mediated apoptosis induced by SAG knockdown [17]. The fact that NOXA accumulates upon Sag deletion or inactivation in both mES and HL-60 cells in response to RA, strongly argue its apoptosis-causing role in these settings.

In summary, our study showed here that Sag E3 ligase determines the cell fate of mES cells to undergo differentiation or apoptosis in response to RA. We also validated that SAG, which is often overexpressed in human cancers [17,50], is an attractive target for RA-mediated differentiation therapy in AML. Together with our previous work, demonstrating that SAG-SCF E3 ubiquitin ligase is an attractive anti-cancer and radiosensitizing target (for review, see [50,51,52,53]), the small molecule inhibitor of SAG-SCF E3 ligase, such as MLN4924, which is currently under several phase I clinical trials [54], may have multiple applications in the treatment of human cancers.

## Materials and Methods

### Ethics Statement

No human participants. All animal procedures were approved by the University of Michigan Committee on Use and Care of Animals with an approval number 09701. Animal care was provided in accordance with the principles and procedures outlined in the National Research Council Guide for the Care and Use of Laboratory Animals.

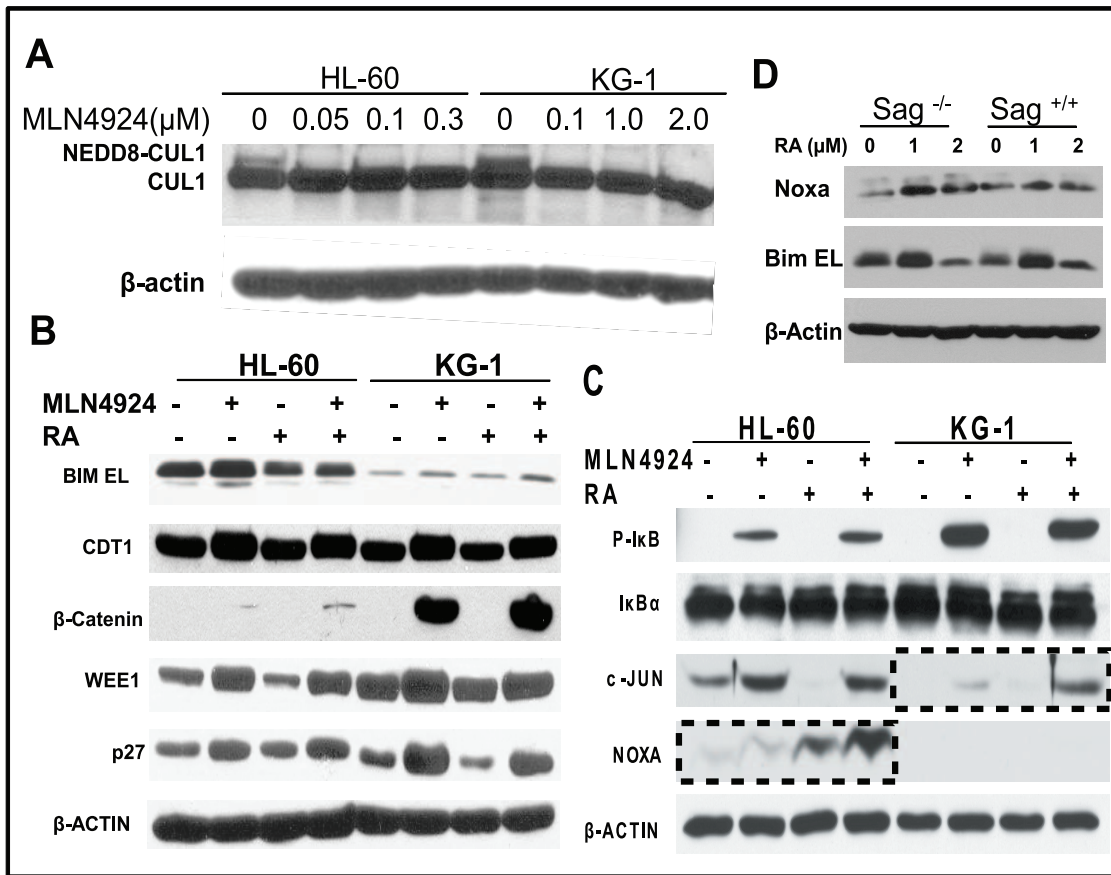

**Figure 6. Induction of SAG-SCF E3 ligase substrates by RA and/or MLN4924.** Cells were treated with indicated concentrations of MLN4924 for 24 hrs, followed by immunoblotting using cullin-1 antibody with  $\beta$ -actin as the loading control (A). Cells were treated with RA (1.5  $\mu$ M), MLN4924 (0.1  $\mu$ M for HL-60, 1.0  $\mu$ M for KG-1) alone or in combination for 24 hrs, followed by immunoblotting using indicated antibodies (B&C). mES cells were treated with RA at indicated concentrations for 24 hrs, followed by immunoblotting using NOXA antibody with  $\beta$ -actin as the loading control (D).

doi:10.1371/journal.pone.0027726.g006

### Generation and maintenance of Sag embryonic stem cells

Generation of ES cells from blastocysts were performed as described [55]. Briefly, blastocysts at the embryonic stage of E3.5 were isolated from *Sag*<sup>+/-</sup> females mated with *Sag*<sup>+/-</sup> males, and cultured on irradiated MEFs feeder cells in DMEM medium containing 15% fetal bovine serum, 0.1 mM  $\beta$ -mercaptoethanol, 50 IU/ml penicillin, 50  $\mu$ g/ml streptomycin, 10<sup>3</sup> u/ml ESGRO, and 12.5  $\mu$ M PD98059. Inner cell mass outgrowths were trypsinized and cultured in 35-mm cell culture dishes in the same medium, but without antibiotics and PD98059. Embryonic stem cells were passaged on 0.1% gelatin-coated dishes to eliminate the feeder cells before genotyping and experimentation.

### Cells and cell culture

All AML cells (KG-1, HL-60, SigM5, ML-2, MV4-11, OCI-AML3 and OCI-AML2) were the gift from Dr. S. Malek at the University of Michigan. All the lines were originally purchased from ATCC and were cultured, according to ATCC suggested culture conditions.

### ATPlite growth assay and IC<sub>50</sub> determination

Cells were seeded in 96-well plates in triplicates and treated with all trans-RA (Sigma) and/or MLN4924 (a gift from Millennium) at various concentrations for 24 hrs (mES) or 44 hrs (AML). Cell viability was measured with ATPlite kit (Perkin Elmer).

### Clonogenic assay

ES cells were seeded in six-well gelatin-coated plates in duplicate. Cells were treated next day with RA at various concentrations, followed by incubation at 37°C incubator for 5 to 7 days. Colonies were washed with PBS once and stained with brilliant blue G-250. The colonies with 50 or more cells were counted [14].

### Alkaline phosphatase (AP) staining

*Sag*<sup>+/-</sup> and *Sag*<sup>-/-</sup> mES cells were seeded in 6-well gelatin-coated plates, treated with DMSO vehicle control or RA at 0.1  $\mu$ M or 1  $\mu$ M for 6 days. The colonies were stained with Alkaline Phosphatase kits (Sigma-Aldrich) according to the manufacture' protocol. Briefly, after PBS wash, the colonies were fixed with fixative solution for 30 seconds, rinsed gently in water for 45 seconds, and then stained with alkaline-dye mixture by incubation at room temperature for 15 minutes. The colonies were rinsed, counterstained with hematoxylin, and evaluated microscopically.

### AFM (Atomic Force Microscopy) nanomechanical analysis

All the experiments for AFM measurement were performed in aqueous environment at room temperature on Bioscope (Bruker AXS, Santa Barbara, CA) using a Nanoscope IV controller. Once

the mES cells seeded onto gelatin-coated glass coverslips grew to confluency in LIF containing medium, they were observed under the AFM with an inverted optical microscopy underneath. AFM nanoindentation was performed on the center of mES cells. At each time point (0, 12, 18, 24 and 36 hrs) post RA addition, 50 cells were randomly selected and measured to obtain the force-displacement curves. In the AFM nanoindentation experiment, a cone-shaped AFM tip with a silicon nitride cantilever (Bruker AXS, Santa Barbara, CA) was used with the spring constant 0.06 nN/nm. The applied force was calculated by Hooke's law as  $F = kd$ , where  $d$  is the vertical deflection of the cantilever and  $k$  is the spring constant of the cantilever. According to Hertzian model, the relationship between indentation force and deformation defines (for a cone-shaped tip):  $F = \frac{2}{\pi} \frac{E}{1-\nu^2} \delta^2 \tan \alpha$ , where  $\alpha$  is the half angle of the cone-shaped AFM tip,  $\nu$  is the Poisson ratio,  $\delta$  is the indentation depth and  $E$  is the Young's modulus value. The half open angle of the tip in our case is  $17.5^\circ$  and we used 0.5 as Poisson ratio. By fitting the force-displacement curve with this model, Young's modulus value can be generated. The Young's moduli were then processed statistically to obtain the mean and standard deviation at each time point.

### Trypan blue exclusion assay

Sag<sup>+/+</sup> or Sag<sup>-/-</sup> mES cells were plated in 24-well gelatin-coated plate and incubated overnight at 37°C. Cells were treated next day with 1  $\mu$ M RA for 24 or 36 hrs. Cells were detached with trypsin, stained with trypan blue dye, and counted microscopically. Ratio of dead blue cells out of total cells counted was plotted.

### DNA fragmentation analysis

The mES cells were seeded in 10-cm dishes at  $2.5 \times 10^6$  cells per dish and treated next day with DMSO (control) or RA (1  $\mu$ M) for 36 hrs. The AML cells were seeded in 25-cm<sup>2</sup> flasks at  $0.5 \times 10^6$  cell/mL (10 mL per flask) and treated for 24 hrs with DMSO (control), RA (1.5  $\mu$ M), MLN4924 (0.1  $\mu$ M for HL-60, 1.0  $\mu$ M for KG-1), alone or in combination. Cells were harvested, pelleted, and lysed in 600  $\mu$ l of lysis buffer (5 mM Tris-HCl, pH8.0, 20 mM EDTA, and 0.5% Triton X-100). DNA was isolated by phenol/chloroform extraction and ethanol precipitation and treated with RNase and subjected to electrophoresis in a 1.8% agarose gel [14].

### Caspase activation assay

The activity of caspase3 was measured using a fluorogenic caspase assay with Ac-DEVA-AFC as the substrate. The results are expressed as fold activation, as compare to the control [14].

## References

- Duan H, Wang Y, Aviram M, Swaroop M, Loo JA, et al. (1999) SAG, a novel zinc RING finger protein that protects cells from apoptosis induced by redox agents. *Mol Cell Biol* 19: 3145–3155.
- Sun Y, Tan M, Duan H, Swaroop M (2001) SAG/ROC/Rbx/Hrt, a zinc RING finger gene family: molecular cloning, biochemical properties, and biological functions. *Antioxid Redox Signal* 3: 635–650.
- Sun Y (1999) Alteration of SAG mRNA in human cancer cell lines: Requirement for the RING finger domain for apoptosis protection. *Carcinogenesis* 20: 1899–1903.
- Yang ES, Park JW (2006) Regulation of nitric oxide-induced apoptosis by sensitive to apoptosis gene protein. *Free Radic Res* 40: 279–284.
- Chanalaris A, Sun Y, Latchman DS, Stephanou A (2003) SAG attenuates apoptotic cell death caused by simulated ischaemia/reoxygenation in rat cardiomyocytes. *J Mol Cell Cardiol* 35: 257–264.
- Lee SJ, Yang ES, Kim SY, Shin SW, Park JW (2008) Regulation of heat shock-induced apoptosis by sensitive to apoptosis gene protein. *Free Radic Biol Med* 45: 167–176.
- Kim SY, Kim MY, Mo JS, Park JW, Park HS (2007) SAG protects human neuroblastoma SH-SY5Y cells against 1-methyl-4-phenylpyridinium ion (MPP<sup>+</sup>)-induced cytotoxicity via the downregulation of ROS generation and JNK signaling. *Neurosci Lett* 413: 132–136.
- He H, Gu Q, Zheng M, Normolle D, Sun Y (2008) SAG/ROC2/RBX2 E3 ligase promotes UVB-induced skin hyperplasia, but not skin tumors, by simultaneously targeting c-Jun/AP-1 and p27. *Carcinogenesis* 29: 858–865.
- Duan H, Tsvetkov LM, Liu Y, Song Y, Swaroop M, et al. (2001) Promotion of S-phase entry and cell growth under serum starvation by SAG/ROC2/Rbx2/Hrt2, an E3 ubiquitin ligase component: association with inhibition of p27 accumulation. *Mol Carcinog* 30: 37–46.
- Gu Q, Bowden TG, Normolle D, Sun Y (2007) SAG/ROC2 E3 ligase regulates skin carcinogenesis by stage dependent targeting of c-Jun/AP1 and I $\kappa$ B/NF- $\kappa$ B. *J Cell Biol* 178: 1009–1023.
- Huang Y, Duan H, Sun Y (2001) Elevated expression of SAG/ROC2/Rbx2/Hrt2 in human colon carcinomas: SAG does not induce neoplastic transformation, but its antisense transfection inhibits tumor cell growth. *Mol Carcinog* 30: 62–70.
- Tan M, Gallegos JR, Gu Q, Huang Y, Li J, et al. (2006) SAG/ROC-SCFbeta-TrCP E3 ubiquitin ligase promotes pro-caspase-3 degradation as a mechanism of apoptosis protection. *Neoplasia* 8: 1042–1054.

### TUNEL staining

Mouse embryonic stem cells were seeded in 12-well gelatin-coated plates, treated with DMSO vehicle control or 1  $\mu$ M RA for 36 hrs. Cells were washed with cold PBS 3 times and fixed in 4% PFA-PBS for subsequent TUNEL staining using *in situ* Cell Death Detection Kit (Roche), according to manufacturer's instruction.

### Immunoblotting analysis

AML cells were harvested and lysed in a Triton X-100 lysis buffer (20 mmol/L Tris-HCl (pH 8.0), 150 mmol/L NaCl, 1% Triton X-100, 5 mmol/L EGTA, and 5 mmol/L EDTA) with freshly added protease inhibitor tablet (Roche, Indianapolis, IN) for 30 min on ice, followed by centrifugation for 20 min. Supernatants were measured for protein concentration using a Bio-Rad protein assay reagent (Bio-Rad, Hercules, CA) and subjected to immunoblotting analysis with the following antibodies: SAG monoclonal antibody (raised against the RING domain) [17], Caspase-3, CUL1, CDT1,  $\beta$ -Catenin, WEE1, I $\kappa$ B $\alpha$ , C-JUN (Santa Cruz Biotechnology, CA),  $\beta$ -Actin (Sigma, MO), p27 (BD PharMingen, CA), Phospho-I $\kappa$ B $\alpha$ , NOXA, PARP, BIM (Cell Signaling Technology, MA).

### FACS (Fluorescence-activated Cell Sorting)

Cells seeded at  $0.5 \times 10^6$  cell/mL in flasks (10 mL per 25-cm<sup>2</sup> flask) were treated for 24 hrs (HL-60) or 36 hrs (KG-1) with DMSO (control), RA (1.5  $\mu$ M), MLN4924 (0.1  $\mu$ M for HL-60, 1.0  $\mu$ M for KG-1), alone or in combination and analyzed by flow cytometry [17].

### Statistical analysis

Paired two-tailed Student's *t* test was used in comparisons between two groups to determine *p* value for statistical significance.

### Acknowledgments

We thank Millennium Pharmaceuticals, Inc., for providing us MLN4924 and Dr. S. Malek at the University of Michigan for providing us AML cell lines. We also thank Dr. C. Su from Bruker AXS, Inc., for his technical advice.

### Author Contributions

Conceived and designed the experiments: YS NX. Performed the experiments: MT YL RY. Analyzed the data: MT YL RY NX YS. Contributed reagents/materials/analysis tools: MT YL RY NX YS. Wrote the paper: YS.



13. Tan M, Zhao Y, Kim S-J, Liu M, Jia L, et al. (2011) SAG/RBX2/ROC2 E3 ubiquitin ligase is essential for vascular and neural development by targeting NF- $\kappa$ B for degradation. *Dev Cell*; in press.
14. Tan M, Zhu Y, Kovacev J, Zhao Y, Pan ZQ, et al. (2010) Disruption of SAG/Rbx2/Roc2 induces radiosensitization by increasing ROS levels and blocking NF- $\kappa$ B activation in mouse embryonic stem cells. *Free Radic Biol Med* 49: 976–983.
15. Gu Q, Tan M, Sun Y (2007) SAG/ROC2/Rbx2 is a novel activator protein-1 target that promotes c-Jun degradation and inhibits 12-O-tetradecanoylphorbol-13-acetate-induced neoplastic transformation. *Cancer Res* 67: 3616–3625.
16. Tan M, Gu Q, He H, Pamarthy D, Semenza GL, et al. (2008) SAG/ROC2/RBX2 is a HIF-1 target gene that promotes HIF-1 $\alpha$  ubiquitination and degradation. *Oncogene* 27: 1404–1411.
17. Jia L, Yang J, Hao X, Zheng M, He H, et al. (2010) Validation of SAG/RBX2/ROC2 E3 Ubiquitin Ligase as an Anticancer and Radiosensitizing Target. *Clin Cancer Res* 16: 814–824.
18. Sasaki H, Yukiue H, Kobayashi Y, Moriyama S, Nakashima Y, et al. (2001) Expression of the sensitive to apoptosis gene, SAG, as a prognostic marker in nonsmall cell lung cancer. *Int J Cancer* 95: 375–377.
19. Dragnev KH, Petty WJ, Dmitrovsky E (2003) Retinoid targets in cancer therapy and chemoprevention. *Cancer Biol Ther* 2: S150–156.
20. Okuno M, Kojima S, Matsushima-Nishiwaki R, Tsurumi H, Muto Y, et al. (2004) Retinoids in cancer chemoprevention. *Curr Cancer Drug Targets* 4: 285–298.
21. Balmer JE, Blomhoff R (2002) Gene expression regulation by retinoic acid. *J Lipid Res* 43: 1773–1808.
22. Theodosiou M, Laudet V, Schubert M (2010) From carrot to clinic: an overview of the retinoic acid signaling pathway. *Cell Mol Life Sci* 67: 1423–1445.
23. Gudas LJ (1994) Retinoids and vertebrate development. *J Biol Chem* 269: 15399–15402.
24. Mark M, Ghyselinck NB, Chambon P (2009) Function of retinoic acid receptors during embryonic development. *Nucl Recept Signal* 7: e002.
25. Gudas LJ, Wagner JA (2011) Retinoids regulate stem cell differentiation. *J Cell Physiol* 226: 322–330.
26. Jimenez-Lara AM, Clarke N, Altucci L, Gronemeyer H (2004) Retinoic-acid-induced apoptosis in leukemia cells. *Trends Mol Med* 10: 508–515.
27. Tang XH, Gudas LJ (2011) Retinoids, retinoic acid receptors, and cancer. *Annu Rev Pathol* 6: 345–364.
28. Bushue N, Wan YJ (2010) Retinoid pathway and cancer therapeutics. *Adv Drug Deliv Rev* 62: 1285–1298.
29. Altucci L, Gronemeyer H (2001) The promise of retinoids to fight against cancer. *Nat Rev Cancer* 1: 181–193.
30. Camacho LH (2003) Clinical applications of retinoids in cancer medicine. *J Biol Regul Homeost Agents* 17: 98–114.
31. Petrie K, Zelent A, Waxman S (2009) Differentiation therapy of acute myeloid leukemia: past, present and future. *Curr Opin Hematol* 16: 84–91.
32. Altucci L, Wilhelm E, Gronemeyer H (2004) Leukemia: beneficial actions of retinoids and rexinoids. *Int J Biochem Cell Biol* 36: 178–182.
33. de The H, Chen Z (2010) Acute promyelocytic leukaemia: novel insights into the mechanisms of cure. *Nat Rev Cancer* 10: 775–783.
34. Huang S, Laoukili J, Epping MT, Koster J, Holzel M, et al. (2009) ZNF423 is critically required for retinoic acid-induced differentiation and is a marker of neuroblastoma outcome. *Cancer Cell* 15: 328–340.
35. Soucy TA, Smith PG, Milhollen MA, Berger AJ, Gavin JM, et al. (2009) An inhibitor of NEDD8-activating enzyme as a new approach to treat cancer. *Nature* 458: 732–736.
36. Swaroop M, Wang Y, Miller P, Duan H, Jatkoec T, et al. (2000) Yeast homolog of human SAG/ROC2/Rbx2/Hrt2 is essential for cell growth, but not for germination: Chip profiling implicates its role in cell cycle regulation. *Oncogene* 19: 2855–2866.
37. Nakayama KI, Nakayama K (2006) Ubiquitin ligases: cell-cycle control and cancer. *Nat Rev Cancer* 6: 369–381.
38. Skaar JR, D'Angiolella V, Pagan JK, Pagano M (2009) SnapShot: F Box Proteins II. *Cell* 137: 1358, 1358 e1351.
39. Dehan E, Bassermann F, Guardavaccaro D, Vasiliver-Shamis G, Cohen M, et al. (2009) betaTrCP- and Rsk1/2-mediated degradation of BimEL inhibits apoptosis. *Mol Cell* 33: 109–116.
40. Soprano DR, Teets BW, Soprano KJ (2007) Role of retinoic acid in the differentiation of embryonal carcinoma and embryonic stem cells. *Vitam Horm* 75: 69–95.
41. Kirmizis D, Logothetidis S (2010) Atomic force microscopy probing in the measurement of cell mechanics. *Int J Nanomedicine* 5: 137–145.
42. Brownell JE, Sintchak MD, Gavin JM, Liao H, Bruzzese FJ, et al. (2010) Substrate-assisted inhibition of ubiquitin-like protein-activating enzymes: the NEDD8 E1 inhibitor MLN4924 forms a NEDD8-AMP mimetic in situ. *Mol Cell* 37: 102–111.
43. Swords RT, Kelly KR, Smith PG, Garnsey JJ, Mahalingam D, et al. (2010) Inhibition of NEDD8-activating enzyme: a novel approach for the treatment of acute myeloid leukemia. *Blood* 115: 3796–3800.
44. Angel P, Karin M (1991) The role of Jun, Fos and the AP-1 complex in cell-proliferation and transformation. *Biochim Biophys Acta* 1072: 129–157.
45. Shaulian E, Karin M (2002) AP-1 as a regulator of cell life and death. *Nat Cell Biol* 4: E131–136.
46. Hayakawa J, Mittal S, Wang Y, Korkmaz KS, Adamson E, et al. (2004) Identification of promoters bound by c-Jun/ATF2 during rapid large-scale gene activation following genotoxic stress. *Mol Cell* 16: 521–535.
47. Vlahopoulos SA, Logotheti S, Mikas D, Giarika A, Gorgoulis V, et al. (2008) The role of ATF-2 in oncogenesis. *Bioessays* 30: 314–327.
48. Oda E, Ohki R, Murasawa H, Nemoto J, Shibue T, et al. (2000) Noxa, a BH3-only member of the Bcl-2 family and candidate mediator of p53-induced apoptosis. *Science* 288: 1053–1058.
49. Cory S, Adams JM (2002) The Bcl2 family: regulators of the cellular life-or-death switch. *Nat Rev Cancer* 2: 647–656.
50. Wei D, Sun Y (2010) Small RING finger proteins RBX1 and RBX2 of SCF E3 ubiquitin ligases: the role in cancer and as cancer targets. *Genes & Cancer* 1: 700–707.
51. Jia L, Sun Y (2011) SCF E3 ubiquitin ligases as anticancer targets. *Current Cancer Drug Targets* 11: 347–356.
52. Sun Y (2003) Targeting E3 ubiquitin ligases for cancer therapy. *Cancer Biol Therapy* 2: 623–629.
53. Sun Y (2006) E3 ubiquitin ligases as cancer targets and biomarkers. *Neoplasia* 8: 645–654.
54. Soucy TA, Smith PG, Rolfe M (2009) Targeting NEDD8-activated cullin-RING ligases for the treatment of cancer. *Clin Cancer Res* 15: 3912–3916.
55. Tan M, Davis SW, Saunders TL, Zhu Y, Sun Y (2009) RBX1/ROC1 disruption results in early embryonic lethality due to proliferation failure, partially rescued by simultaneous loss of p27. *Proc Natl Acad Sci U S A* 106: 6203–6208.
